# Supplementary material
Source: PubMed Central journal article supplement (PMC4404423)
Supplement: supp_JCO.2014.58.7824_DS_JCO.2014.58.7824.pdf [file supp_JCO.2014.58.7824_DS_JCO.2014.58.7824.pdf]

**Benefits of Early vs. Delayed Palliative Care to Informal Family Caregivers of Persons with Advanced Cancer: Outcomes from the ENABLE III Randomized Controlled Trial**

**Dionne-Odom, et al**

Initials: \_\_\_\_\_

Reg. # \_\_\_\_\_

**D0946 Early vs. Later Palliative Cancer Care: Clinical and Biobehavioral Effects  
ENABLE III**

**Callahan Score** \_\_\_\_\_

**6-Item Cognitive Screen**

**“I would like to ask you some questions that ask you to use your memory. I am going to name three objects. Please wait until I say all three words, then repeat them. Remember what they are because I am going to ask you to name them again in a few minutes. Please repeat these words for me: APPLE-TABLE-PENNY.”**

*(Interviewer may repeat names 3 times if necessary but repetition not scored). Did the patient correctly repeat all three words?      Yes    No*

|                                                                  | Incorrect (0 points) | Correct (1 point) |
|------------------------------------------------------------------|----------------------|-------------------|
| 1. <b>“What year is this?”</b>                                   |                      |                   |
| 2. <b>“What month is this?”</b>                                  |                      |                   |
| 3. <b>“What is the day of the week?”</b>                         |                      |                   |
| 4. <b>“What were the three objects I asked you to remember?”</b> |                      |                   |
| Apple                                                            |                      |                   |
| Table                                                            |                      |                   |
| Penny                                                            |                      |                   |
|                                                                  |                      | Total points =    |

*Patient is eligible for the study if the score  $\geq 4$*
